# Supplementary material for: Microwave rotational spectroscopic investigation of the Ar2–NH3van der Waals trimer
Source: Royal Society of Chemistry journal article supplement (doi:10.1039/b207136c), 2002-01-01
Supplement: tables.pdf [file tables.pdf]

Supplementary Tables for:

**Microwave rotational spectroscopic investigation of the Ar<sub>2</sub>-NH<sub>3</sub> van der Waals trimer**

Jennifer van Wijngaarden and Wolfgang Jäger

*Department of Chemistry, University of Alberta, Edmonton, Alberta, Canada T6G 2G2.*

Table S1. Measured transition frequencies (MHz) for the  $\Sigma 0_0$  states of Ar<sub>2</sub>-ND<sub>3</sub>.

| $J'_{Ka''Kc''}$<br>$J''_{Ka''Kc''}$ | F'-F'' | $\Sigma 0_{0s}$    |               | $\Sigma 0_{0a}$    |               |
|-------------------------------------|--------|--------------------|---------------|--------------------|---------------|
|                                     |        | $\nu_{\text{obs}}$ | $\Delta\nu^a$ | $\nu_{\text{obs}}$ | $\Delta\nu^a$ |
| 1 <sub>11</sub> -0 <sub>00</sub>    | 0-1    | 3924.8156          | 3.2           | 3924.6454          | 0.0           |
|                                     | 1-1    | 3925.0499          | -0.8          | 3924.8848          | -0.3          |
|                                     | 2-1    | 3925.2079          | -1.6          |                    |               |
| 2 <sub>02</sub> -1 <sub>11</sub>    | 1-1    | 4274.2520          | 0.2           |                    |               |
|                                     | 3-2    | 4274.4876          | -1.4          | 4274.6154          | -7.2          |
|                                     | 1-0    | 4274.6514          | 2.5           | 4274.7839          | -0.5          |
| 2 <sub>20</sub> -1 <sub>11</sub>    | 2-1    | 10511.8436         | -2.4          | 10511.3960         | 5.8           |
|                                     | 3-2    | 10512.1512         | 5.4           | 10511.6917         | 1.5           |
|                                     | 1-0    | 10512.4574         | -5.0          |                    |               |
| 3 <sub>13</sub> -2 <sub>02</sub>    | 2-2    | 7978.1250          | -3.2          |                    |               |
|                                     | 4-3    | 7978.3692          | 3.2           |                    |               |
|                                     | 3-2    | 7978.4994          | -2.0          |                    |               |
|                                     | 3-3    | 7978.6466          | 4.2           |                    |               |
| 3 <sub>22</sub> -2 <sub>11</sub>    | 2-1    | 11772.2932         | 1.3           | 11771.7956         | -2.8          |
|                                     | 4-3    | 11772.3849         | -1.5          | 11771.8928         | -0.7          |
|                                     | 3-2    | 11772.5560         | -0.6          | 11772.0617         | -3.1          |
| 3 <sub>31</sub> -2 <sub>20</sub>    | 2-1    | 15565.2613         | -1.0          |                    |               |
|                                     | 4-3    | 15565.3061         | 0.4           | 15564.4840         | 5.5           |
|                                     | 3-2    | 15565.3462         | -0.6          | 15564.5231         | 3.0           |
| 3 <sub>22</sub> -3 <sub>13</sub>    | 3-3    | 6456.7303          | -1.5          | 6456.2727          | -2.8          |
|                                     | 4-4    | 6457.0084          | 0.2           | 6456.5506          | -1.1          |
|                                     | 2-2    | 6457.1064          | 1.4           |                    |               |
| 3 <sub>31</sub> -3 <sub>22</sub>    | 3-3    | 7367.4910          | 2.6           | 7366.6867          | -4.3          |
|                                     | 4-4    | 7367.5923          | 4.0           | 7366.7882          | -1.4          |
|                                     | 2-2    | 7367.6181          | -5.2          | 7366.8218          | -2.3          |
| 4 <sub>04</sub> -3 <sub>13</sub>    | 5-4    | 9445.9757          | 3.6           |                    |               |
|                                     | 4-3    | 9445.9922          | -1.7          |                    |               |
| 4 <sub>13</sub> -3 <sub>22</sub>    | 4-3    | 9420.3263          | -5.4          | 9420.7547          | -3.3          |
|                                     | 5-4    | 9420.3857          | -3.2          | 9420.8156          | -0.8          |
|                                     | 3-2    | 9420.4104          | 6.7           | 9420.8347          | 3.3           |
| 4 <sub>13</sub> -4 <sub>04</sub>    | 4-4    | 6431.0706          | 1.1           |                    |               |
|                                     | 5-5    | 6431.4254          | 0.4           |                    |               |
|                                     | 3-3    | 6431.5168          | 0.4           |                    |               |

<sup>a</sup>  $\Delta\nu = \nu_{\text{obs}} - \nu_{\text{calc}}$  in kHz.

Table S2. Measured transition frequencies (MHz) for the  $\Sigma 0_0$  states of  $\text{Ar}_2\text{-ND}_2\text{H}$ .

| $J'_{\text{Ka}''\text{Kc}''}$<br>$J''_{\text{Ka}''\text{Kc}''}$ | F'-F'' | $\Sigma 0_{00s}$   |               | $\Sigma 0_{00a}$   |               |
|-----------------------------------------------------------------|--------|--------------------|---------------|--------------------|---------------|
|                                                                 |        | $\nu_{\text{obs}}$ | $\Delta\nu^a$ | $\nu_{\text{obs}}$ | $\Delta\nu^a$ |
| 1 <sub>11</sub> -0 <sub>00</sub>                                | 0-1    | 4058.3565          | -3.7          | 4058.4065          | 3.1           |
|                                                                 | 1-1    | 4058.5618          | 0.0           | 4058.5979          | -3.7          |
|                                                                 | 2-1    | 4058.6973          | 1.2           |                    |               |
| 2 <sub>02</sub> -1 <sub>11</sub>                                | 1-1    | 4213.2817          | 2.9           |                    |               |
|                                                                 | 3-2    | 4213.4810          | 9.0           |                    |               |
|                                                                 | 1-0    | 4213.6054          | -9.4          | 4213.7363          | -2.1          |
| 2 <sub>20</sub> -1 <sub>11</sub>                                | 2-1    | 10841.9966         | -2.8          | 10842.0274         | 3.8           |
|                                                                 | 3-2    | 10842.2444         | 4.9           | 10842.2633         | 0.5           |
|                                                                 | 1-0    | 10842.4974         | -2.5          | 10842.5213         | 0.9           |
| 3 <sub>13</sub> -2 <sub>02</sub>                                | 2-2    | 8170.9195          | -2.1          | 8171.1173          | -4.7          |
|                                                                 | 4-3    | 8171.1061          | 0.7           | 8171.3062          | -0.8          |
|                                                                 | 3-2    | 8171.2239          | 1.4           | 8171.4222          | -0.5          |
| 3 <sub>22</sub> -2 <sub>11</sub>                                | 2-1    | 12172.5560         | -4.3          |                    |               |
|                                                                 | 4-3    | 12172.6408         | 0.6           | 12172.7638         | -0.1          |
|                                                                 | 3-2    | 12172.7900         | 5.8           | 12172.9094         | 4.0           |
| 3 <sub>31</sub> -2 <sub>20</sub>                                | 3-3    | 16172.3459         | -4.1          |                    |               |
|                                                                 | 4-3    | 16172.4244         | 0.9           | 16172.4866         | 2.3           |
|                                                                 | 3-2    | 16172.4566         | 0.9           | 16172.5145         | -0.9          |
|                                                                 | 2-2    | 16172.5549         | -0.2          |                    |               |
| 3 <sub>22</sub> -3 <sub>13</sub>                                | 3-3    |                    |               | 6727.4650          | -3.8          |
|                                                                 | 4-4    | 6727.8287          | -1.6          | 6727.6867          | -4.8          |
|                                                                 | 3-4    | 6727.8287          | -1.6          | 6727.6867          | -4.8          |
|                                                                 | 3-2    | 6727.9071          | -1.2          | 6727.7730          | 3.6           |
|                                                                 | 2-2    | 6727.9071          | -1.2          | 6727.7730          | 3.6           |
| 3 <sub>31</sub> -3 <sub>22</sub>                                | 3-3    | 7902.1891          | 7.2           | 7902.0786          | 5.7           |
|                                                                 | 4-4    | 7902.2578          | 2.3           | 7902.1497          | 0.8           |
|                                                                 | 2-2    | 7902.2737          | -7.5          | 7902.1668          | -8.6          |
| 4 <sub>04</sub> -3 <sub>13</sub>                                | 5-4    | 9528.4508          | -3.4          | 9528.7198          | -0.2          |
|                                                                 | 4-3    | 9528.4731          | 6.5           | 9528.7328          | 0.1           |
| 4 <sub>13</sub> -3 <sub>22</sub>                                | 4-3    | 9178.7429          | -1.0          | 9178.9411          | -1.0          |
|                                                                 | 5-4    | 9178.8028          | -2.2          | 9179.0020          | 1.2           |
| 4 <sub>13</sub> -4 <sub>04</sub>                                | 4-4    | 6377.8864          | 1.7           | 6377.6782          | 0.0           |
|                                                                 | 5-5    | 6378.1817          | 0.6           | 6377.9712          | -1.0          |
|                                                                 | 3-3    | 6378.2581          | 0.8           | 6378.0487          | 0.9           |

<sup>a</sup>  $\Delta\nu = \nu_{\text{obs}} - \nu_{\text{calc}}$  in kHz.

Table S3. Measured transition frequencies (MHz) for the  $\Sigma 0_{00}$  states of Ar<sub>2</sub>-NDH<sub>2</sub>.

| $J'_{Ka''Kc''}$<br>$J''_{Ka''Kc''}$ | F'-F'' | $\Sigma 0_{00s}$   |               | $\Sigma 0_{00a}$   |               |
|-------------------------------------|--------|--------------------|---------------|--------------------|---------------|
|                                     |        | $\nu_{\text{obs}}$ | $\Delta\nu^a$ | $\nu_{\text{obs}}$ | $\Delta\nu^a$ |
| 1 <sub>11</sub> -0 <sub>00</sub>    | 0-1    | 4204.7140          | -1.6          | 4205.4309          | 0.8           |
|                                     | 1-1    | 4204.8812          | 3.0           | 4205.5932          | 0.0           |
|                                     | 2-1    | 4204.9916          | 5.0           | 4205.7014          | -0.6          |
| 2 <sub>02</sub> -1 <sub>11</sub>    | 1-1    |                    |               | 4139.6740          | -2.2          |
|                                     | 2-1    |                    |               | 4139.7971          | 3.1           |
|                                     | 3-2    |                    |               | 4139.8255          | -1.5          |
|                                     | 2-2    | 4140.0308          | -5.1          | 4139.9037          | 1.0           |
|                                     | 1-0    | 4140.0773          | -3.3          | 4139.9469          | -1.2          |
| 2 <sub>20</sub> -1 <sub>11</sub>    | 2-1    | 11208.9382         | -2.6          | 11210.6354         | 0.2           |
|                                     | 3-2    | 11209.1272         | 2.2           | 11210.8209         | 0.1           |
|                                     | 1-0    | 11209.3335         | 3.7           | 11211.0241         | -0.1          |
| 3 <sub>13</sub> -2 <sub>02</sub>    | 2-2    | 8381.3033          | -3.2          | 8382.3928          | 1.1           |
|                                     | 4-3    | 8381.4037          | 0.5           | 8382.5248          | -3.0          |
|                                     | 3-2    | 8381.1710          | 0.7           | 8382.6260          | 1.2           |
| 3 <sub>22</sub> -2 <sub>11</sub>    | 2-1    | 12611.3780         | -0.4          | 12613.5227         | -1.3          |
|                                     | 4-3    | 12611.3780         | -0.4          | 12613.5227         | -1.3          |
|                                     | 3-2    | 12611.4998         | 5.2           | 12613.6418         | 1.3           |
|                                     | 2-2    | 12611.4998         | 5.2           | 12613.6418         | 1.3           |
| 3 <sub>31</sub> -2 <sub>20</sub>    | 4-3    | 16839.1205         | -7.7          | 16842.1934         | -2.7          |
|                                     | 3-2    | 16839.1582         | 6.2           | 16842.2234         | 3.4           |
| 3 <sub>22</sub> -3 <sub>13</sub>    | 3-3    | 7030.6489          | 2.3           | 7031.8365          | 0.9           |
|                                     | 4-3    | 7030.6489          | 2.3           | 7031.8365          | 0.9           |
|                                     | 2-3    | 7030.6489          | 2.3           | 7031.8365          | 0.9           |
|                                     | 4-4    | 7030.8242          | 5.1           | 7032.0097          | 1.4           |
|                                     | 3-4    | 7030.8242          | 5.1           | 7032.0097          | 1.4           |
|                                     | 3-2    | 7030.8687          | -10.8         | 7032.0620          | -6.7          |
|                                     | 2-2    | 7030.8687          | -10.8         | 7032.0620          | -6.7          |
| 3 <sub>31</sub> -3 <sub>22</sub>    | 3-4    | 8496.1192          | 3.7           | 8496.5991          | -1.7          |
|                                     | 3-3    | 8496.1192          | 3.7           | 8496.5991          | -1.7          |
|                                     | 3-2    | 8496.1192          | 3.7           | 8496.5991          | -1.7          |
|                                     | 4-4    | 8496.1667          | -0.9          | 8496.6536          | 1.0           |
|                                     | 4-3    | 8496.1667          | -0.9          | 8496.6536          | 1.0           |
| 4 <sub>04</sub> -3 <sub>13</sub>    | 5-4    | 9602.1202          | 0.0           | 9602.9037          | 3.7           |
| 4 <sub>13</sub> -3 <sub>22</sub>    | 4-3    | 8889.8454          | 3.1           | 8888.9066          | -3.7          |
|                                     | 5-4    | 8889.8976          | -3.1          | 8888.9691          | 0.0           |
| 4 <sub>13</sub> -4 <sub>04</sub>    | 4-4    |                    |               | 6317.8430          | 1.8           |
|                                     | 5-5    | 6318.5997          | 0.0           | 6318.0768          | -0.6          |
|                                     | 3-3    |                    |               | 6318.1424          | 4.3           |

<sup>a</sup>  $\Delta\nu = \nu_{\text{obs}} - \nu_{\text{calc}}$  in kHz.
